# Supplementary material for: Quintets of uracil and thymine: a novel structure of nucleobase self-assembly studied by electrospray ionization mass spectrometry
Source: Royal Society of Chemistry journal article supplement (doi:10.1039/b903857d), 2009-01-01
Supplement: b903857d.pdf [file b903857d.pdf]

## **Quintets of uracil and thymine: a novel structure of nucleobase self-assembly studied by electrospray ionization mass spectrometry**

by Bo Qiu et al (2009)

### **Supporting material**

#### **Experimental Sections**

##### **Chemicals**

HPLC grade methanol was purchased from Fisher Scientific (Pittsburgh, PA, USA). Uracil, 1-methyluracil, 3-methyluracil, 1,3-dimethyluracil, thymine, 5-ethyluracil, 5,6-dimethyluracil, and 4-thiouracil were obtained from Sigma-Aldrich (St. Louis, MO, USA). 6-Methyluracil was purchased from Tokyo Chemical Industry (Tokyo, Japan). 2-Thiouracil was obtained from J&K Chemical LTD (Beijing, China). Alkali metal salts (LiCl, NaCl, KCl, RbCl and CsCl) were purchased from Acros Organics (Morris Plains, NJ, USA).

##### **ESI-MS**

All experiments were performed in positive ion mode on a Thermo Finnigan LCQ Advantage MAX ion-trap mass spectrometer (San Jose, CA, USA) with a home-build open access ESI source.<sup>1</sup> The main experimental parameters used were as follows: spray voltage 5.5 kV, capillary voltage 8.0 V, tube lens offset 0.0 V, heated capillary temperature 150 °C, nebulizing gas pressure 0.4 MPa. The samples were dissolved in solution of methanol/water (1:1), and were introduced into the emitter at a flow rate of 2.5  $\mu$ L/min. To obtain collision energy dependent dissociation profiles, the non-covalent complexes were isolated in the ion trap and activated by gradually increasing collision energies (in 1% increment from 5% to 15% relative collision energies). The resonant excitation occurred at a  $q_z$  value of 0.25 for 30 ms. All MS data were processed using the instrument software (Xcalibur version 1.4 SR1).

## Computational Method

To save calculation time, the preliminary optimization was carried out on the base of MM2 force field from Chem3D ultra 8.0.3. Then the non-covalent complexes,  $[U_5 + Na]^+$  and  $[U_5 + K]^+$ , were fully optimized by using Gaussian 03W with DFT method at B3LYP/6-311 G(*d*, *p*) level.

## Reference

1. B. Qiu, H. Luo, *J. Mass. Spectrom.*, published online on January 21, 2009.

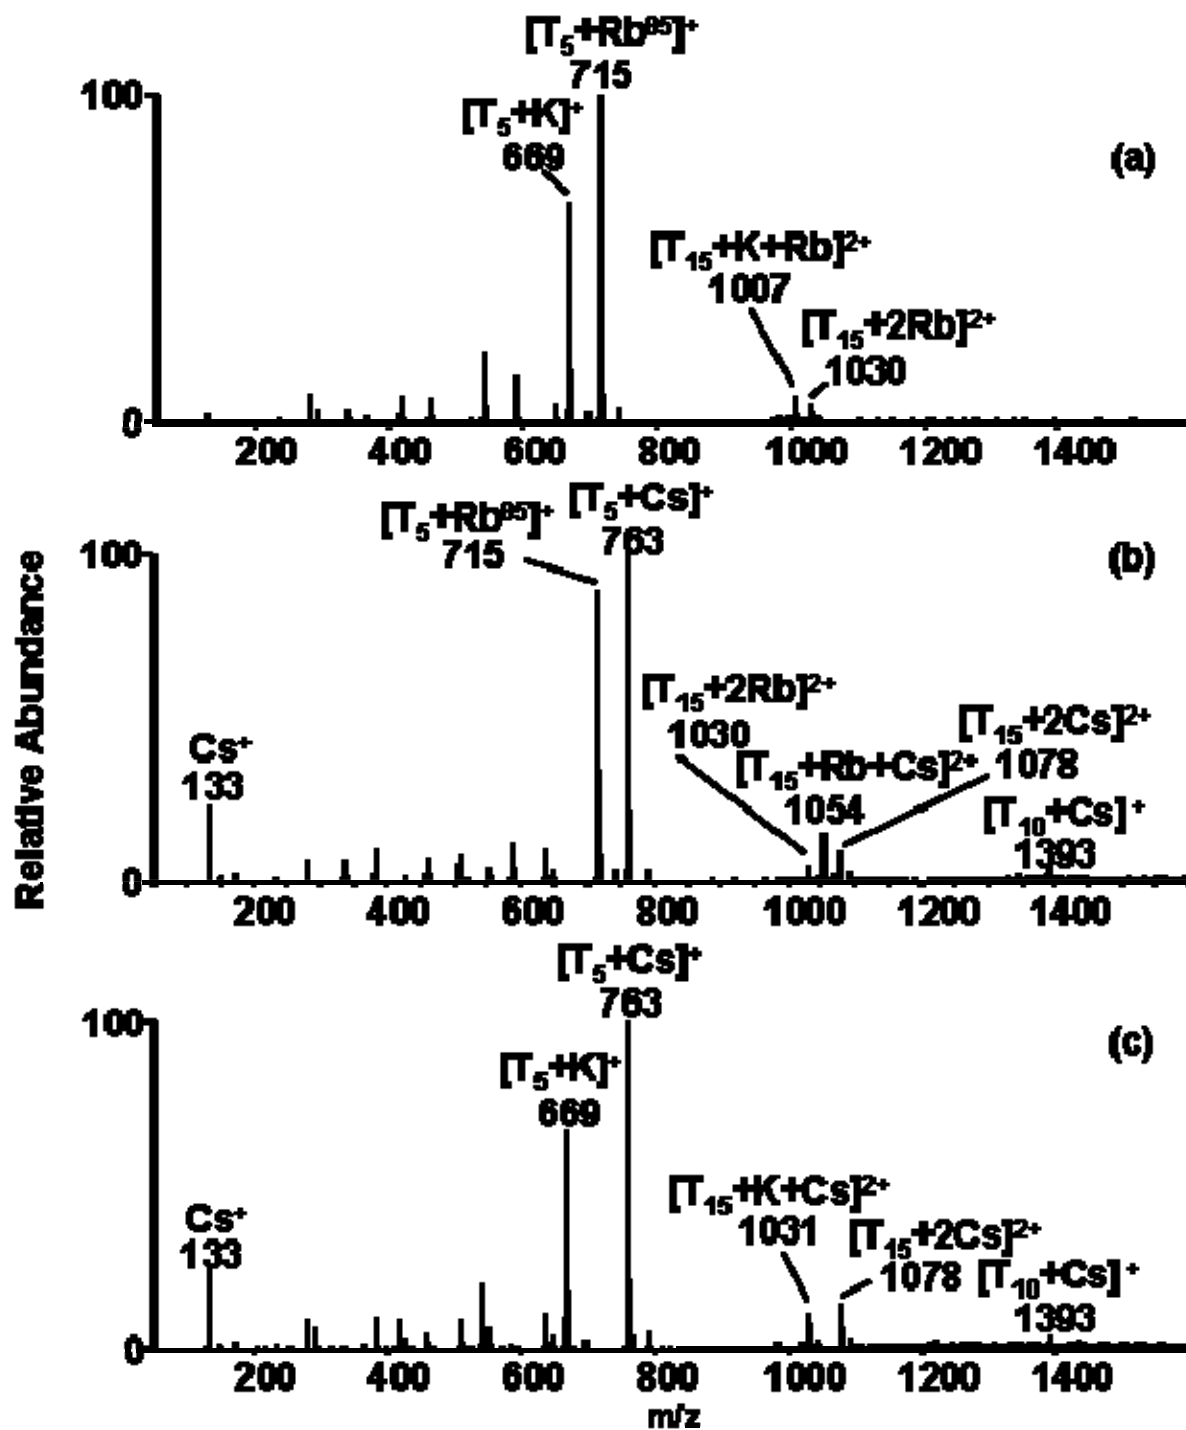

Fig. S1. ESI mass spectra of  $6.0 \times 10^{-4}$  M thymine mixed with  $2.0 \times 10^{-4}$  M KCl and  $2.0 \times 10^{-4}$  M RbCl (a);  $2.0 \times 10^{-4}$  M RbCl and  $2.0 \times 10^{-4}$  M CsCl (b);  $2.0 \times 10^{-4}$  M KCl and  $2.0 \times 10^{-4}$  M CsCl (c). The signal of  $[T_5 + Rb^{87}]^+$  which is not labeled in the figures was also included in the total ion intensity of  $[T_5 + Rb]^+$  for the comparison.

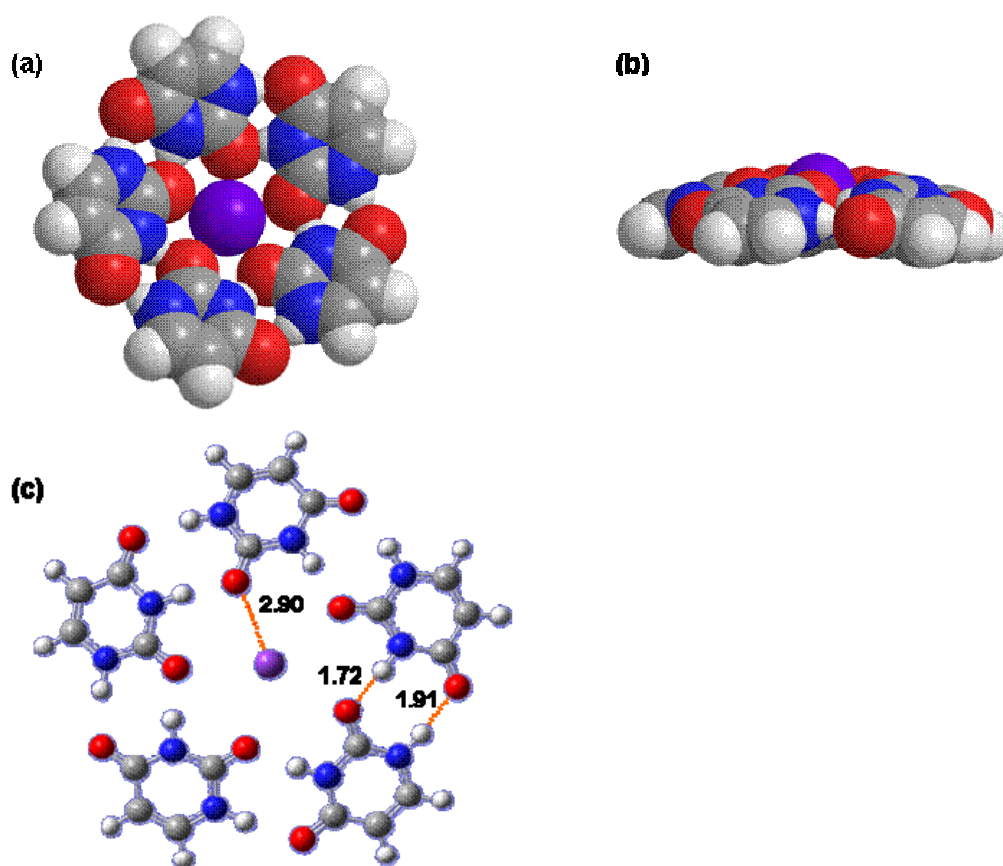

Fig. S2. The optimized structure of  $[U_5 + K]^+$  in "space filling" mode (a) top view, (b) side view, and "ball and stick" mode (c). The bond length is in Å. Color representations for atoms are: red for O; blue for N; grey for C; white for H; purple for metal ion.

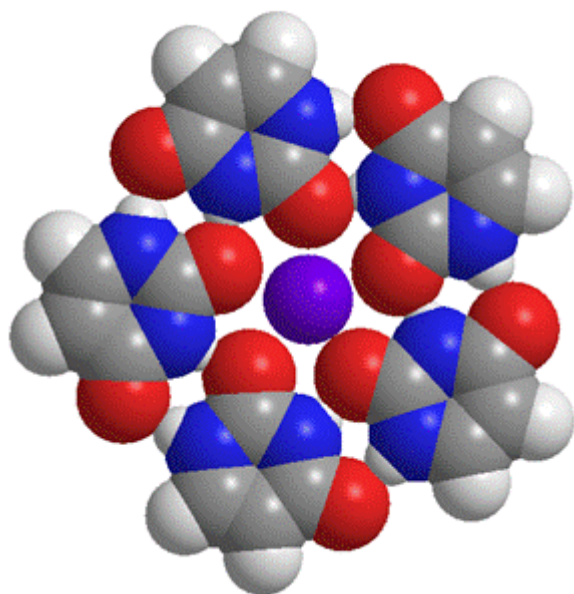

Fig. S3. The optimized structure of  $[U_5 + Na]^+$  in “space filling” mode. Color representations for atoms are: red for O; blue for N; grey for C; white for H; purple for metal ion.
